# Supplementary material
Source: PubMed Central journal article supplement (PMC2722838)
Supplement: bi802292q_si_001.pdf [file bi802292q_si_001.pdf]

## Supporting Information

# The structure of the cataract causing P23T mutant of HgD crystallin exhibits distinctive local conformational and dynamic changes.

Jinwon Jung<sup>1</sup>, In-Ja L. Byeon<sup>1</sup>, Yongting Wang<sup>2</sup>, Jonathan King<sup>2</sup>, Angela M. Gronenborn<sup>1</sup>

1. Department of Structural Biology, School of Medicine, University of Pittsburgh, Pittsburgh, PA 15260, USA

2. Department of Biology, Massachusetts Institute of Technology, Cambridge, Massachusetts 02139

Supporting information: Figures S1 –S4 that present NMR spectra illustrating differences between the wild-type, P23T, P23V and P23S HgD and similarities between His-tagged and non-His-tagged mutant P23T HgD.

Supporting information  
Fig. S1.

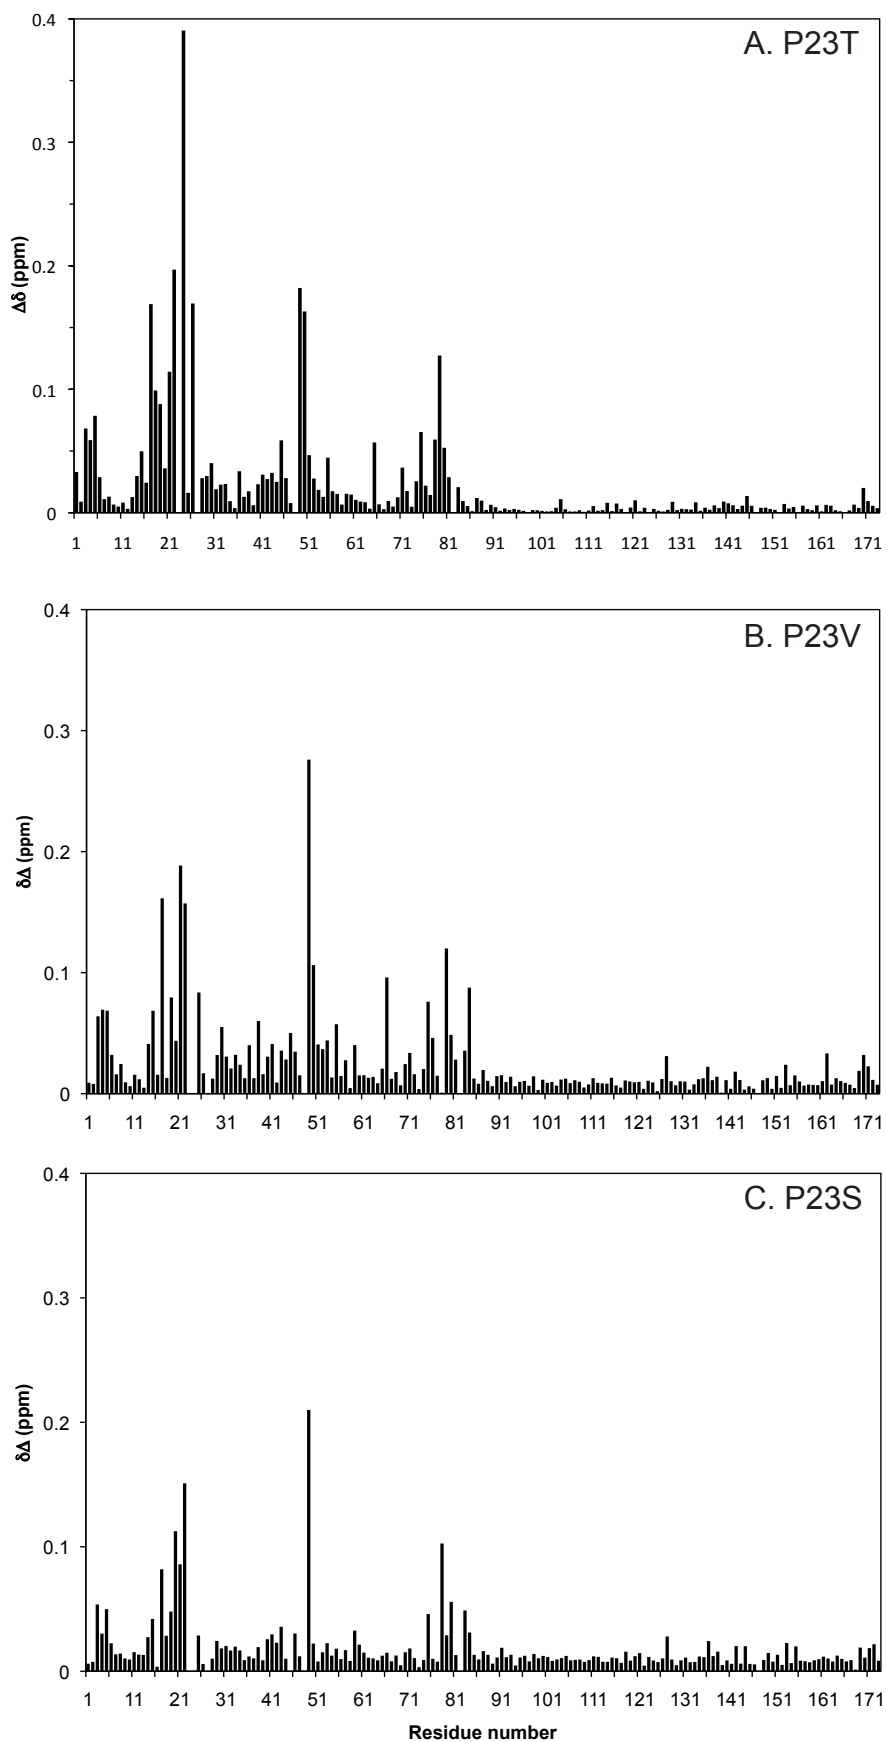

Figure S1. Backbone chemical shift difference between the mutant and wild-type HgD proteins. (A) P23T (B) P23V and (C) P23S. No values are plotted for prolines and unassigned residues.

Supporting information  
Fig. S2.

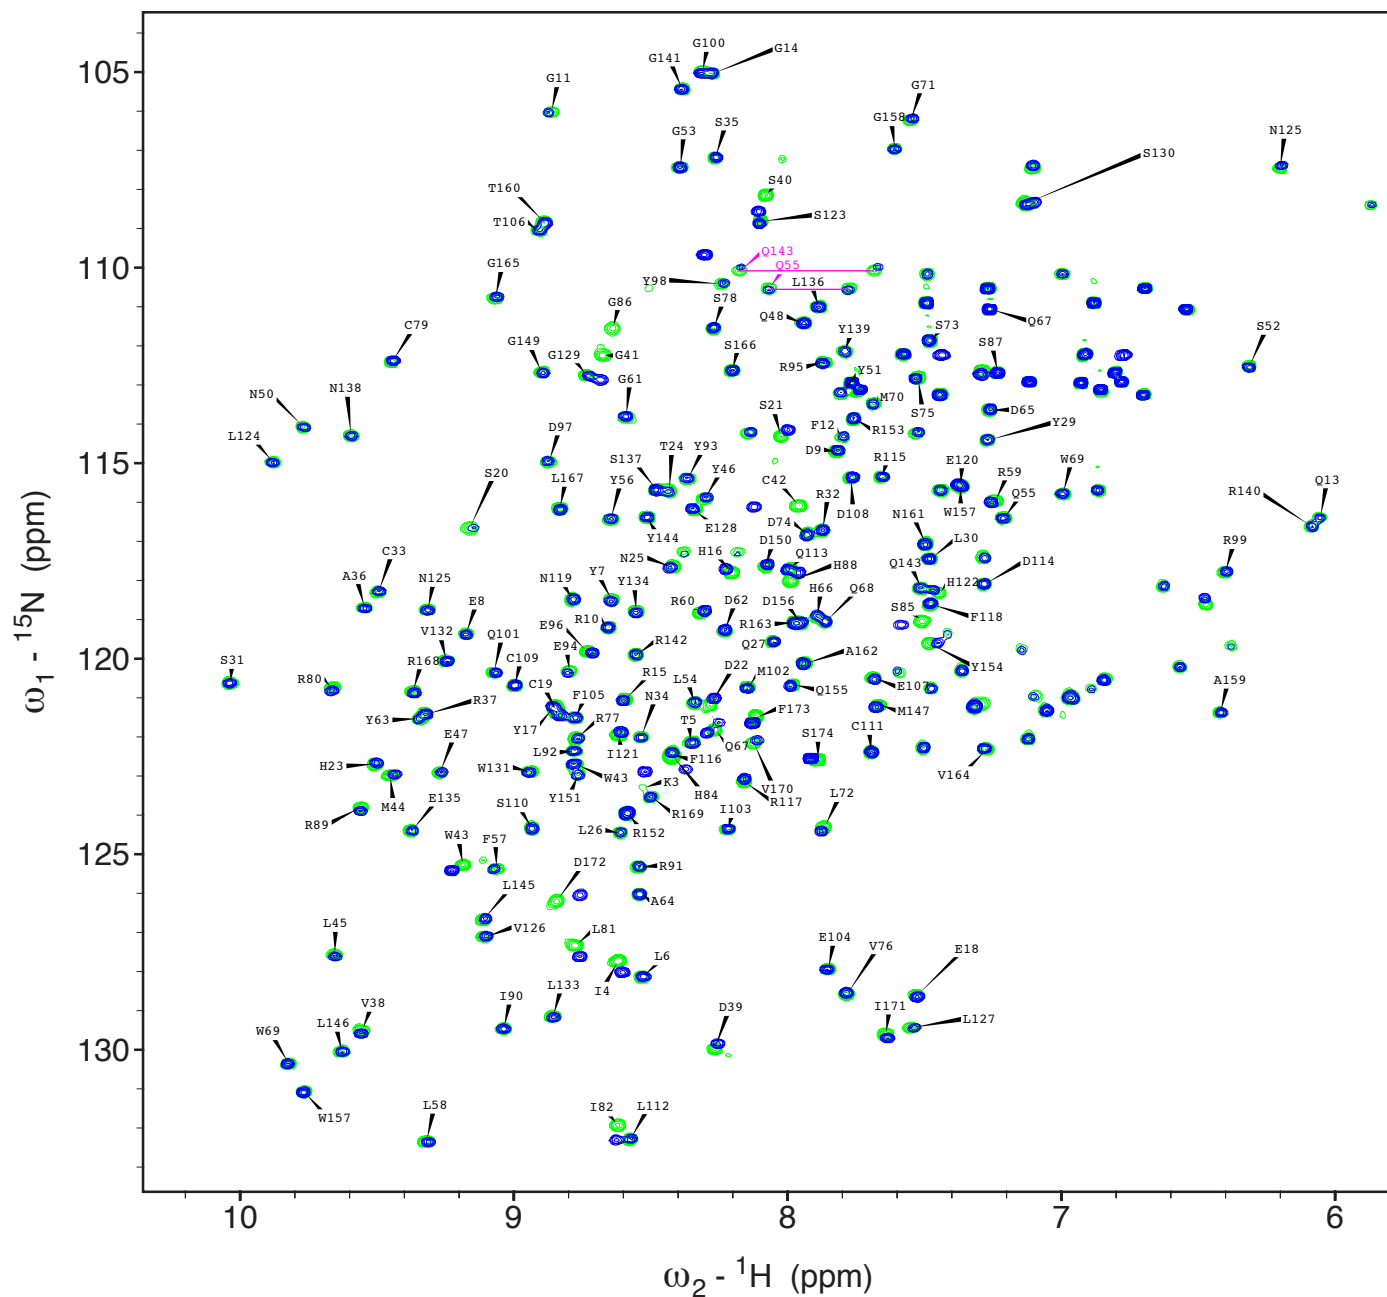

Figure S2. Superposition of the  $^1\text{H}$ - $^{15}\text{N}$  HSQC spectra of the His-tagged and non-His-tagged P23T HgD mutant proteins. Spectra were collected for samples in 20mM sodium phosphate buffer, 5mM DTT, 0.02%  $\text{NaN}_3$ , pH 6.2 at 700MHz. Resonances for the His-tagged and non-His-tagged proteins are plotted in blue and green, respectively, and assignments are marked with residue names and numbers. All residue numbers are shifted as +1 from numbering in Figure 2.

Supporting information  
Fig. S3.

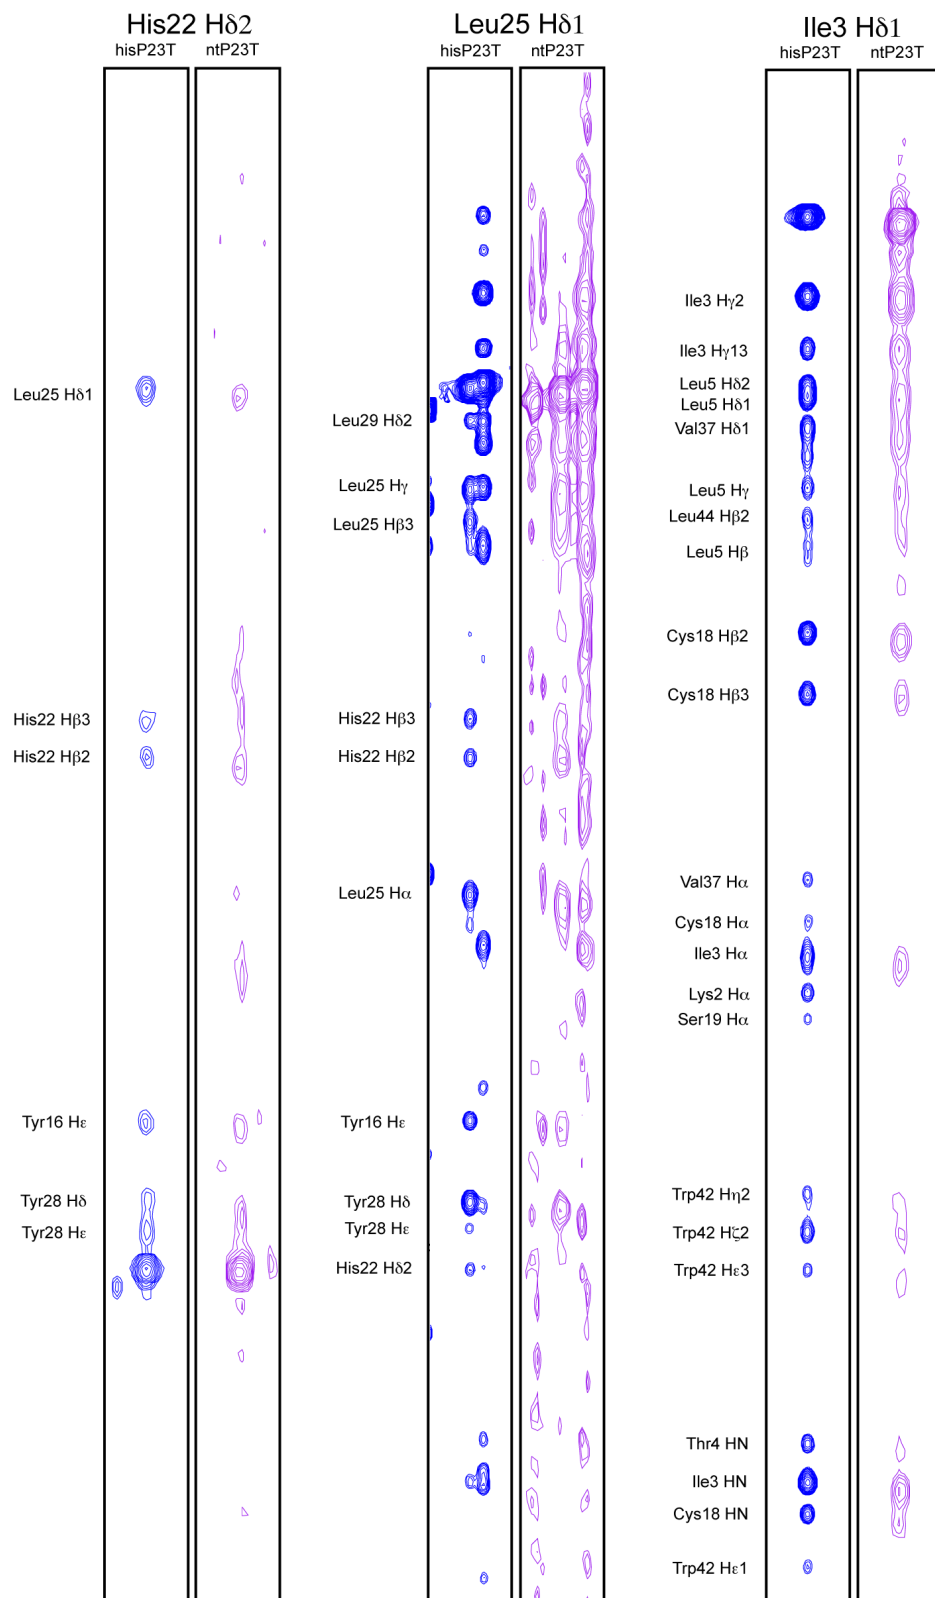

Figure S3. Selected strips from the  $^{13}\text{C}$ -edited NOESY spectra recorded for the His-tagged (blue) and non-His-tagged (purple) P23T HgD mutant proteins. Three strips are shown for His22 H $\delta$ 2, Leu25 H $\delta$ 1 and Ile3 H $\delta$ 1 protons, respectively. Assignments of the NOEs are labeled at the left side of the strips.

Supporting information  
Fig. S4

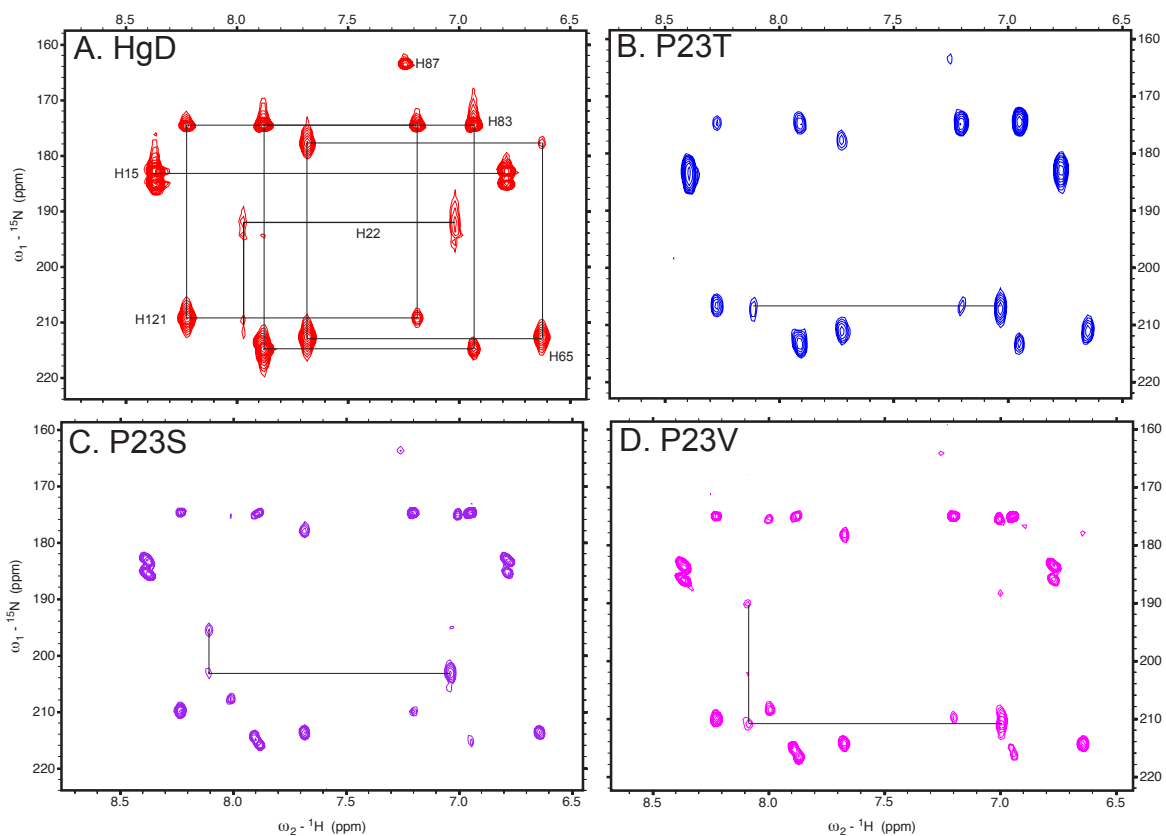

Figure S4.  $^1\text{H}$ - $^{15}\text{N}$  HMBC spectra of wild-type and mutant HgD proteins. All spectra were recorded at 600 MHz for protein samples in 20mM sodium phosphate buffer, 5mM DTT, 0.02%  $\text{NaN}_3$ , pH 6.2 except the spectrum in (A) that was collected at 800MHz. In (A) all resonances that belong to the same imidazole ring are connected, whereas in (B)-(D) only those resonances that arise from the imidazole ring of His22 are connected.
